# Supplementary material
Source: PubMed Central journal article supplement (PMC4357547)
Supplement: NIHMS642155-supplement-Supp_FigureS1-S6.pdf [file NIHMS642155-supplement-Supp_FigureS1-S6.pdf]

# Supporting Figure 1

**A**

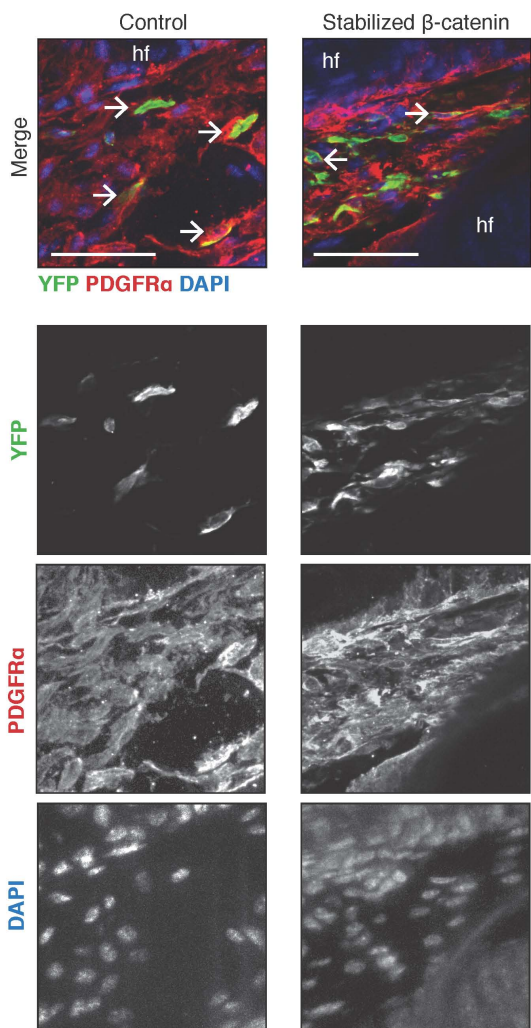

**B**

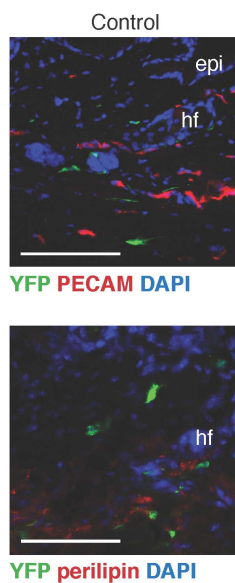

**C**

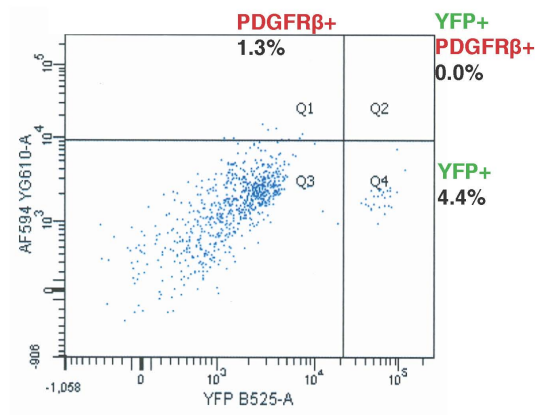

# Supporting Figure 2

A

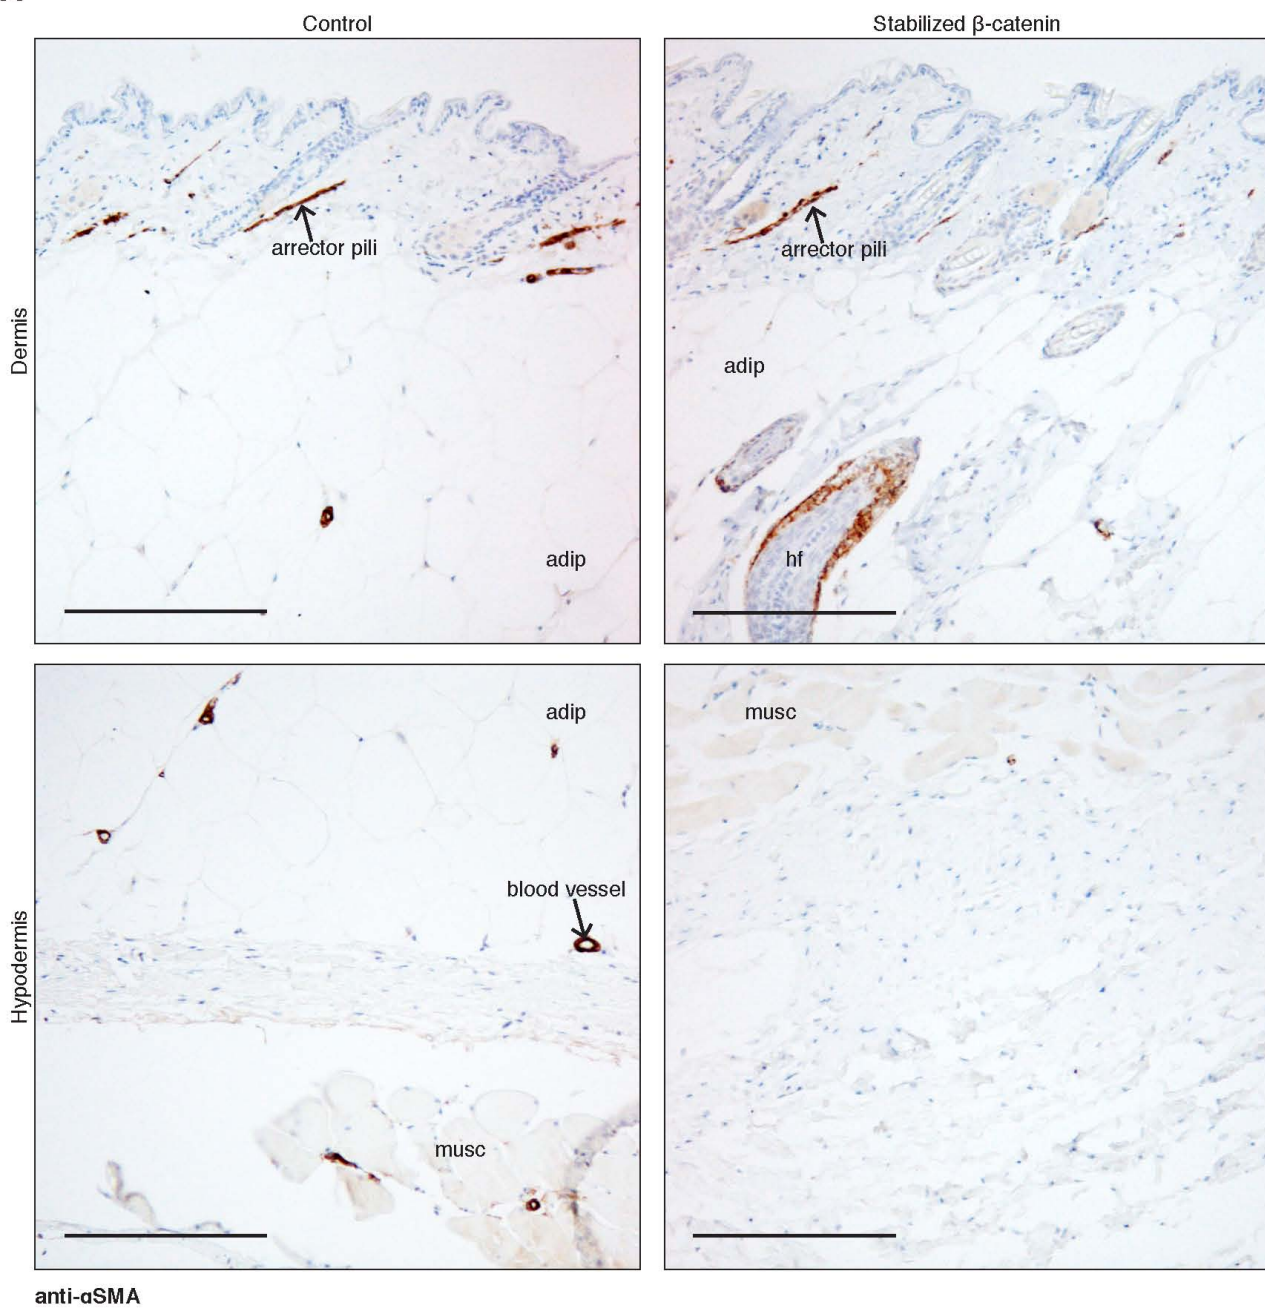

# Supporting Figure 3

**A**

*PAI1 (Serpine1)*

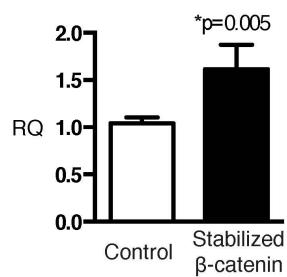

Control

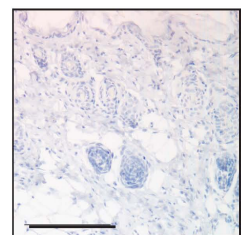

secondary-only control

**B**

1 week

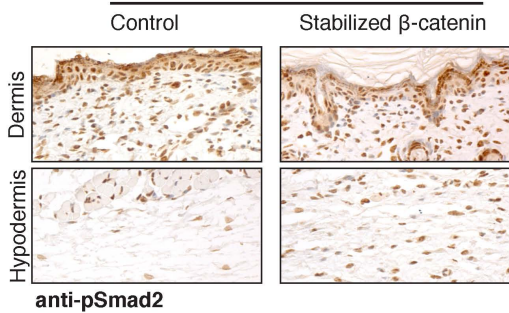

3 weeks

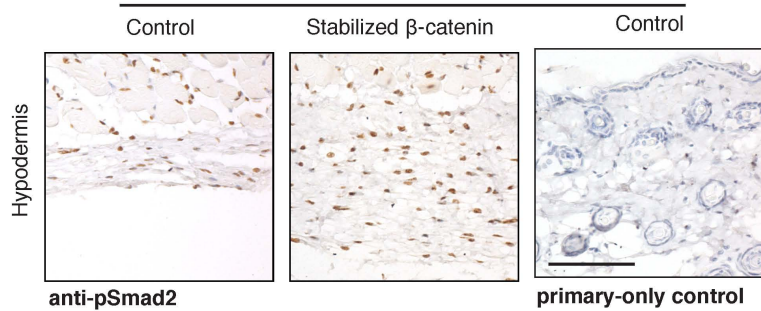

**C**

1 week

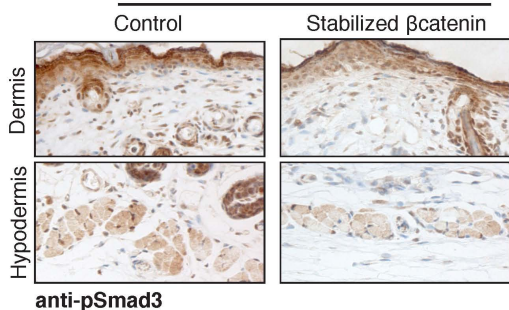

3 weeks

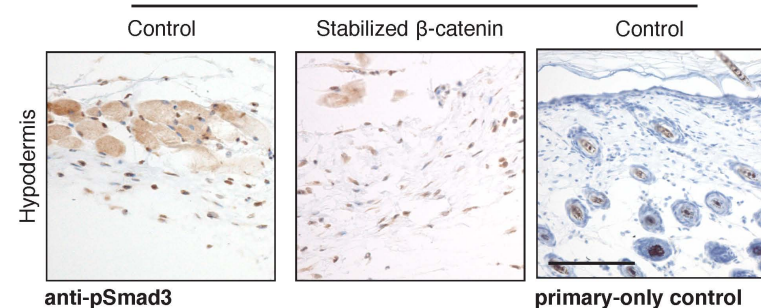

Supporting Figure 4

**A**

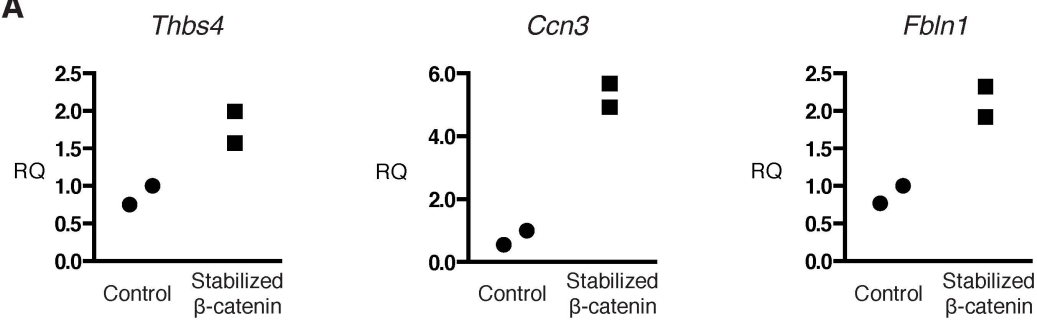

**B**

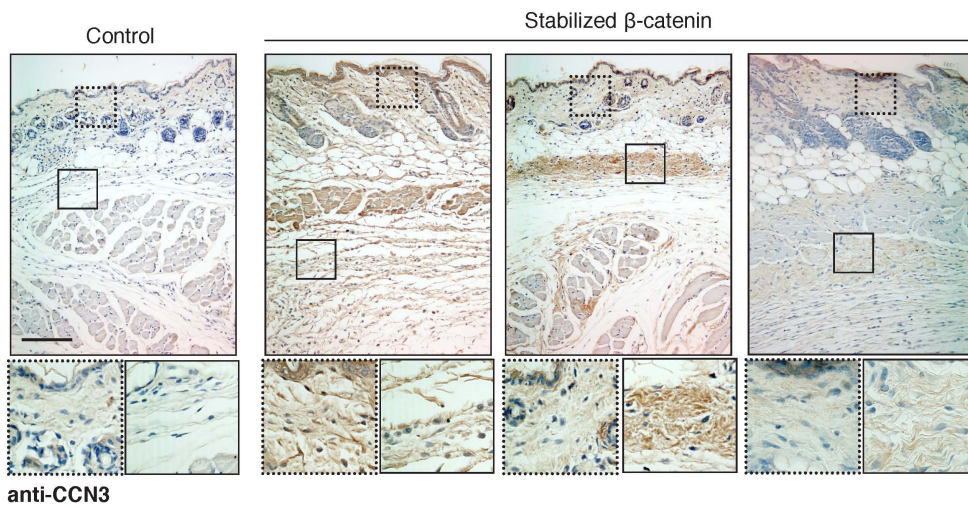

**Supporting Figure 5**

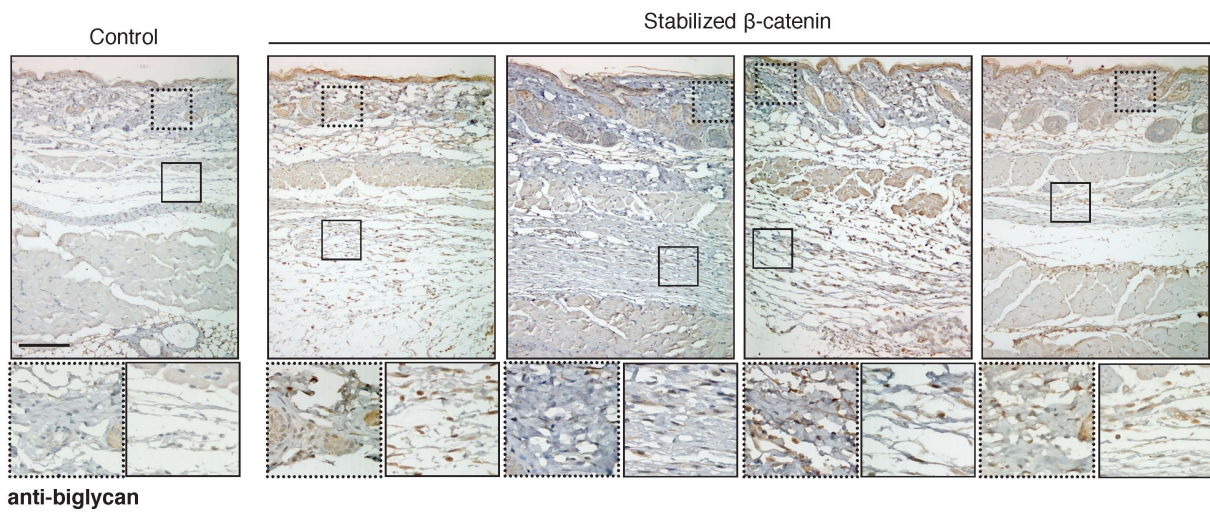

# Supporting Figure 5

Healthy control

Keloid

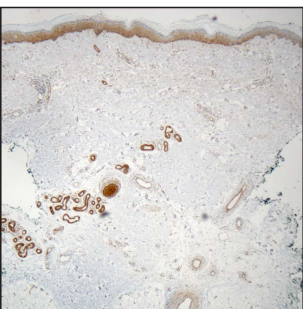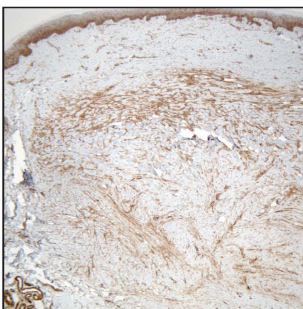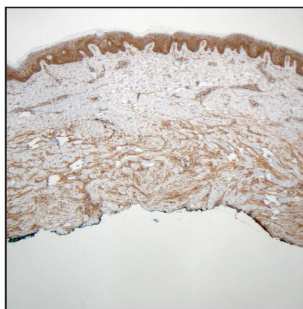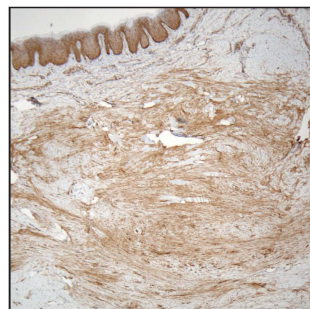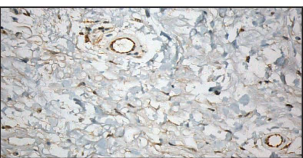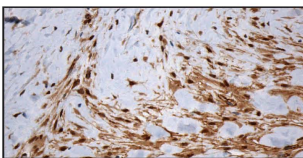

anti-β-catenin
